# Supplementary material
Source: ML conference proceedings conference paper supplement (https://proceedings.neurips.cc/paper_files/paper/2022/hash/1b3750390ca8b931fb9ca988647940cb-Abstract.html)
Supplement: Supplementary file 1 [file 1b3750390ca8b931fb9ca988647940cb-Supplemental-Conference.zip]

Archive with 37 entries (32 files):
- supplemental/
- supplemental/files/
- supplemental/files/jquery-3.4.1.min.220afd743d.js
- supplemental/files/NeMF_Supplemental.pdf
- supplemental/files/supplemental.css
- supplemental/files/video/
- supplemental/files/video/240fps.mp4
- supplemental/files/video/30fps.mp4
- supplemental/files/video/60fps.mp4
- supplemental/files/video/aist_1.mp4
- supplemental/files/video/aist_2.mp4
- supplemental/files/video/amass_recon.mp4
- supplemental/files/video/clip_inbetween/
- supplemental/files/video/clip_inbetween/gt.mp4
- supplemental/files/video/clip_inbetween/hm_vae.mp4
- supplemental/files/video/clip_inbetween/inertia.mp4
- supplemental/files/video/clip_inbetween/nemf.mp4
- supplemental/files/video/clip_inbetween/rmi.mp4
- supplemental/files/video/clip_inbetween/slerp.mp4
- supplemental/files/video/dog.mp4
- supplemental/files/video/keyframe_inbetween/
- supplemental/files/video/keyframe_inbetween/gt.mp4
- supplemental/files/video/keyframe_inbetween/hm_vae.mp4
- supplemental/files/video/keyframe_inbetween/nemf.mp4
- supplemental/files/video/keyframe_inbetween/slerp.mp4
- supplemental/files/video/lerp_color.mp4
- supplemental/files/video/no_trans.mp4
- supplemental/files/video/recon_comp_1.mp4
- supplemental/files/video/renavi_gt_hi.mp4
- supplemental/files/video/renavi_line_hi.mp4
- supplemental/files/video/renavi_sinusoidal_hi.mp4
- supplemental/files/video/reorient_spin.mp4
- supplemental/files/video/reorient_turn.mp4
- supplemental/files/video/with_trans.mp4
- supplemental/files/webflow.3cd0ca831.js
- supplemental/files/webfont.js
- supplemental/index.html
