# Supplementary material
Source: ML conference proceedings conference paper supplement (https://proceedings.neurips.cc/paper_files/paper/2022/hash/1b3750390ca8b931fb9ca988647940cb-Abstract.html)
Supplement: Supplementary file 1 [file 1b3750390ca8b931fb9ca988647940cb-Supplemental-Conference.zip › supplemental/files/supplemental.css]

/* Generated on: Tue Jul 14 2020 21:23:46 GMT+0000 (Coordinated Universal Time) */
/* ==========================================================================
   normalize.css v3.0.3 | MIT License | github.com/necolas/normalize.css 
   ========================================================================== */
/*! normalize.css v3.0.3 | MIT License | github.com/necolas/normalize.css */
html {
    font-family: sans-serif;
    -ms-text-size-adjust: 100%;
    -webkit-text-size-adjust: 100%
}

body {
    margin: 0
}

article,
aside,
details,
figcaption,
figure,
footer,
header,
hgroup,
main,
menu,
nav,
section,
summary {
    display: block
}

audio,
canvas,
progress,
video {
    display: inline-block;
    vertical-align: baseline
}

audio:not([controls]) {
    display: none;
    height: 0
}

[hidden],
template {
    display: none
}

a {
    background-color: transparent
}

a:active,
a:hover {
    outline: 0
}

abbr[title] {
    border-bottom: 1px dotted
}

b,
strong {
    font-weight: bold
}

dfn {
    font-style: italic
}

h1 {
    font-size: 2em;
    margin: .67em 0
}

mark {
    background: #ff0;
    color: #000
}

small {
    font-size: 80%
}

sub,
sup {
    font-size: 75%;
    line-height: 0;
    position: relative;
    vertical-align: baseline
}

sup {
    top: -0.5em
}

sub {
    bottom: -0.25em
}

img {
    border: 0
}

svg:not(:root) {
    overflow: hidden
}

figure {
    margin: 1em 40px
}

hr {
    box-sizing: content-box;
    height: 0
}

pre {
    overflow: auto
}

code,
kbd,
pre,
samp {
    font-family: monospace, monospace;
    font-size: 1em
}

button,
input,
optgroup,
select,
textarea {
    color: inherit;
    font: inherit;
    margin: 0
}

button {
    overflow: visible
}

button,
select {
    text-transform: none
}

button,
html input[type="button"],
input[type="reset"] {
    -webkit-appearance: button;
    cursor: pointer
}

button[disabled],
html input[disabled] {
    cursor: default
}

button::-moz-focus-inner,
input::-moz-focus-inner {
    border: 0;
    padding: 0
}

input {
    line-height: normal
}

input[type="checkbox"],
input[type="radio"] {
    box-sizing: border-box;
    padding: 0
}

input[type="number"]::-webkit-inner-spin-button,
input[type="number"]::-webkit-outer-spin-button {
    height: auto
}

input[type="search"] {
    -webkit-appearance: none
}

input[type="search"]::-webkit-search-cancel-button,
input[type="search"]::-webkit-search-decoration {
    -webkit-appearance: none
}

fieldset {
    border: 1px solid #c0c0c0;
    margin: 0 2px;
    padding: .35em .625em .75em
}

legend {
    border: 0;
    padding: 0
}

textarea {
    overflow: auto
}

optgroup {
    font-weight: bold
}

table {
    border-collapse: collapse;
    border-spacing: 0
}

td,
th {
    padding: 0
}

/* ==========================================================================
   Start of base Webflow CSS - If you're looking for some ultra-clean CSS, skip the boilerplate and see the unminified code below.
   ========================================================================== */
@font-face {
    font-family: 'webflow-icons';
    src: url("data:application/x-font-ttf;charset=utf-8;base64,AAEAAAALAIAAAwAwT1MvMg8SBiUAAAC8AAAAYGNtYXDpP+a4AAABHAAAAFxnYXNwAAAAEAAAAXgAAAAIZ2x5ZmhS2XEAAAGAAAADHGhlYWQTFw3HAAAEnAAAADZoaGVhCXYFgQAABNQAAAAkaG10eCe4A1oAAAT4AAAAMGxvY2EDtALGAAAFKAAAABptYXhwABAAPgAABUQAAAAgbmFtZSoCsMsAAAVkAAABznBvc3QAAwAAAAAHNAAAACAAAwP4AZAABQAAApkCzAAAAI8CmQLMAAAB6wAzAQkAAAAAAAAAAAAAAAAAAAABEAAAAAAAAAAAAAAAAAAAAABAAADpAwPA/8AAQAPAAEAAAAABAAAAAAAAAAAAAAAgAAAAAAADAAAAAwAAABwAAQADAAAAHAADAAEAAAAcAAQAQAAAAAwACAACAAQAAQAg5gPpA//9//8AAAAAACDmAOkA//3//wAB/+MaBBcIAAMAAQAAAAAAAAAAAAAAAAABAAH//wAPAAEAAAAAAAAAAAACAAA3OQEAAAAAAQAAAAAAAAAAAAIAADc5AQAAAAABAAAAAAAAAAAAAgAANzkBAAAAAAEBIAAAAyADgAAFAAAJAQcJARcDIP5AQAGA/oBAAcABwED+gP6AQAABAOAAAALgA4AABQAAEwEXCQEH4AHAQP6AAYBAAcABwED+gP6AQAAAAwDAAOADQALAAA8AHwAvAAABISIGHQEUFjMhMjY9ATQmByEiBh0BFBYzITI2PQE0JgchIgYdARQWMyEyNj0BNCYDIP3ADRMTDQJADRMTDf3ADRMTDQJADRMTDf3ADRMTDQJADRMTAsATDSANExMNIA0TwBMNIA0TEw0gDRPAEw0gDRMTDSANEwAAAAABAJ0AtAOBApUABQAACQIHCQEDJP7r/upcAXEBcgKU/usBFVz+fAGEAAAAAAL//f+9BAMDwwAEAAkAABcBJwEXAwE3AQdpA5ps/GZsbAOabPxmbEMDmmz8ZmwDmvxmbAOabAAAAgAA/8AEAAPAAB0AOwAABSInLgEnJjU0Nz4BNzYzMTIXHgEXFhUUBw4BBwYjNTI3PgE3NjU0Jy4BJyYjMSIHDgEHBhUUFx4BFxYzAgBqXV6LKCgoKIteXWpqXV6LKCgoKIteXWpVSktvICEhIG9LSlVVSktvICEhIG9LSlVAKCiLXl1qal1eiygoKCiLXl1qal1eiygoZiEgb0tKVVVKS28gISEgb0tKVVVKS28gIQABAAABwAIAA8AAEgAAEzQ3PgE3NjMxFSIHDgEHBhUxIwAoKIteXWpVSktvICFmAcBqXV6LKChmISBvS0pVAAAAAgAA/8AFtgPAADIAOgAAARYXHgEXFhUUBw4BBwYHIxUhIicuAScmNTQ3PgE3NjMxOAExNDc+ATc2MzIXHgEXFhcVATMJATMVMzUEjD83NlAXFxYXTjU1PQL8kz01Nk8XFxcXTzY1PSIjd1BQWlJJSXInJw3+mdv+2/7c25MCUQYcHFg5OUA/ODlXHBwIAhcXTzY1PTw1Nk8XF1tQUHcjIhwcYUNDTgL+3QFt/pOTkwABAAAAAQAAmM7nP18PPPUACwQAAAAAANciZKUAAAAA1yJkpf/9/70FtgPDAAAACAACAAAAAAAAAAEAAAPA/8AAAAW3//3//QW2AAEAAAAAAAAAAAAAAAAAAAAMBAAAAAAAAAAAAAAAAgAAAAQAASAEAADgBAAAwAQAAJ0EAP/9BAAAAAQAAAAFtwAAAAAAAAAKABQAHgAyAEYAjACiAL4BFgE2AY4AAAABAAAADAA8AAMAAAAAAAIAAAAAAAAAAAAAAAAAAAAAAAAADgCuAAEAAAAAAAEADQAAAAEAAAAAAAIABwCWAAEAAAAAAAMADQBIAAEAAAAAAAQADQCrAAEAAAAAAAUACwAnAAEAAAAAAAYADQBvAAEAAAAAAAoAGgDSAAMAAQQJAAEAGgANAAMAAQQJAAIADgCdAAMAAQQJAAMAGgBVAAMAAQQJAAQAGgC4AAMAAQQJAAUAFgAyAAMAAQQJAAYAGgB8AAMAAQQJAAoANADsd2ViZmxvdy1pY29ucwB3AGUAYgBmAGwAbwB3AC0AaQBjAG8AbgBzVmVyc2lvbiAxLjAAVgBlAHIAcwBpAG8AbgAgADEALgAwd2ViZmxvdy1pY29ucwB3AGUAYgBmAGwAbwB3AC0AaQBjAG8AbgBzd2ViZmxvdy1pY29ucwB3AGUAYgBmAGwAbwB3AC0AaQBjAG8AbgBzUmVndWxhcgBSAGUAZwB1AGwAYQByd2ViZmxvdy1pY29ucwB3AGUAYgBmAGwAbwB3AC0AaQBjAG8AbgBzRm9udCBnZW5lcmF0ZWQgYnkgSWNvTW9vbi4ARgBvAG4AdAAgAGcAZQBuAGUAcgBhAHQAZQBkACAAYgB5ACAASQBjAG8ATQBvAG8AbgAuAAAAAwAAAAAAAAAAAAAAAAAAAAAAAAAAAAAAAAAAAAAAAA==") format('truetype');
    font-weight: normal;
    font-style: normal
}

[class^="w-icon-"],
[class*=" w-icon-"] {
    font-family: 'webflow-icons' !important;
    speak: none;
    font-style: normal;
    font-weight: normal;
    font-variant: normal;
    text-transform: none;
    line-height: 1;
    -webkit-font-smoothing: antialiased;
    -moz-osx-font-smoothing: grayscale
}

.w-icon-slider-right:before {
    content: "\e600"
}

.w-icon-slider-left:before {
    content: "\e601"
}

.w-icon-nav-menu:before {
    content: "\e602"
}

.w-icon-arrow-down:before,
.w-icon-dropdown-toggle:before {
    content: "\e603"
}

.w-icon-file-upload-remove:before {
    content: "\e900"
}

.w-icon-file-upload-icon:before {
    content: "\e903"
}

* {
    -webkit-box-sizing: border-box;
    -moz-box-sizing: border-box;
    box-sizing: border-box
}

html {
    height: 100%
}

body {
    margin: 0;
    min-height: 100%;
    background-color: #fff;
    font-family: Arial, sans-serif;
    font-size: 14px;
    line-height: 20px;
    /* color: #333 */
}

img {
    max-width: 100%;
    vertical-align: middle;
    display: inline-block
}

html.w-mod-touch * {
    background-attachment: scroll !important
}

.w-block {
    display: block
}

.w-inline-block {
    max-width: 100%;
    display: inline-block
}

.w-clearfix:before,
.w-clearfix:after {
    content: " ";
    display: table;
    grid-column-start: 1;
    grid-row-start: 1;
    grid-column-end: 2;
    grid-row-end: 2
}

.w-clearfix:after {
    clear: both
}

.w-hidden {
    display: none
}

.w-button {
    display: inline-block;
    padding: 9px 15px;
    background-color: #3898EC;
    color: white;
    border: 0;
    line-height: inherit;
    text-decoration: none;
    cursor: pointer;
    border-radius: 0
}

input.w-button {
    -webkit-appearance: button
}

html[data-w-dynpage] [data-w-cloak] {
    color: transparent !important
}

.w-webflow-badge,
.w-webflow-badge * {
    position: static;
    left: auto;
    top: auto;
    right: auto;
    bottom: auto;
    z-index: auto;
    display: block;
    visibility: visible;
    overflow: visible;
    overflow-x: visible;
    overflow-y: visible;
    box-sizing: border-box;
    width: auto;
    height: auto;
    max-height: none;
    max-width: none;
    min-height: 0;
    min-width: 0;
    margin: 0;
    padding: 0;
    float: none;
    clear: none;
    border: 0 none transparent;
    border-radius: 0;
    background: none;
    background-image: none;
    background-position: 0 0;
    background-size: auto auto;
    background-repeat: repeat;
    background-origin: padding-box;
    background-clip: border-box;
    background-attachment: scroll;
    background-color: transparent;
    box-shadow: none;
    opacity: 1;
    transform: none;
    transition: none;
    direction: ltr;
    font-family: inherit;
    font-weight: inherit;
    color: inherit;
    font-size: inherit;
    line-height: inherit;
    font-style: inherit;
    font-variant: inherit;
    text-align: inherit;
    letter-spacing: inherit;
    text-decoration: inherit;
    text-indent: 0;
    text-transform: inherit;
    list-style-type: disc;
    text-shadow: none;
    font-smoothing: auto;
    vertical-align: baseline;
    cursor: inherit;
    white-space: inherit;
    word-break: normal;
    word-spacing: normal;
    word-wrap: normal
}

.w-webflow-badge {
    position: fixed !important;
    display: inline-block !important;
    visibility: visible !important;
    z-index: 2147483647 !important;
    top: auto !important;
    right: 12px !important;
    bottom: 12px !important;
    left: auto !important;
    color: #AAADB0 !important;
    background-color: #fff !important;
    border-radius: 3px !important;
    padding: 6px 8px 6px 6px !important;
    font-size: 12px !important;
    opacity: 1 !important;
    line-height: 14px !important;
    text-decoration: none !important;
    transform: none !important;
    margin: 0 !important;
    width: auto !important;
    height: auto !important;
    overflow: visible !important;
    white-space: nowrap;
    box-shadow: 0 0 0 1px rgba(0, 0, 0, 0.1), 0 1px 3px rgba(0, 0, 0, 0.1);
    cursor: pointer
}

.w-webflow-badge>img {
    display: inline-block !important;
    visibility: visible !important;
    opacity: 1 !important;
    vertical-align: middle !important
}

h1,
h2,
h3,
h4,
h5,
h6 {
    font-weight: bold;
    margin-bottom: 10px
}

h1 {
    font-size: 38px;
    line-height: 44px;
    margin-top: 20px
}

h2 {
    font-size: 32px;
    line-height: 36px;
    margin-top: 20px
}

h3 {
    font-size: 24px;
    line-height: 30px;
    margin-top: 20px
}

h4 {
    font-size: 18px;
    line-height: 24px;
    margin-top: 10px
}

h5 {
    font-size: 14px;
    line-height: 20px;
    margin-top: 10px
}

h6 {
    font-size: 12px;
    line-height: 18px;
    margin-top: 10px
}

p {
    margin-top: 0;
    margin-bottom: 10px
}

blockquote {
    margin: 0 0 10px 0;
    padding: 10px 20px;
    border-left: 5px solid #E2E2E2;
    font-size: 18px;
    line-height: 22px
}

figure {
    margin: 0;
    margin-bottom: 10px
}

figcaption {
    margin-top: 5px;
    text-align: center
}

ul,
ol {
    margin-top: 0;
    /* margin-bottom: 10px; */
    padding-left: 40px
}

.w-list-unstyled {
    padding-left: 0;
    list-style: none
}

.w-embed:before,
.w-embed:after {
    content: " ";
    display: table;
    grid-column-start: 1;
    grid-row-start: 1;
    grid-column-end: 2;
    grid-row-end: 2
}

.w-embed:after {
    clear: both
}

.w-video {
    width: 100%;
    position: relative;
    padding: 0
}

.w-video iframe,
.w-video object,
.w-video embed {
    position: absolute;
    top: 0;
    left: 0;
    width: 100%;
    height: 100%
}

fieldset {
    padding: 0;
    margin: 0;
    border: 0
}

button,
html input[type="button"],
input[type="reset"] {
    border: 0;
    cursor: pointer;
    -webkit-appearance: button
}

.w-form {
    margin: 0 0 15px
}

.w-form-done {
    display: none;
    padding: 20px;
    text-align: center;
    background-color: #dddddd
}

.w-form-fail {
    display: none;
    margin-top: 10px;
    padding: 10px;
    background-color: #ffdede
}

label {
    display: block;
    margin-bottom: 5px;
    font-weight: bold
}

.w-input,
.w-select {
    display: block;
    width: 100%;
    height: 38px;
    padding: 8px 12px;
    margin-bottom: 10px;
    font-size: 14px;
    line-height: 1.42857143;
    color: #333333;
    vertical-align: middle;
    background-color: #ffffff;
    border: 1px solid #cccccc
}

.w-input:-moz-placeholder,
.w-select:-moz-placeholder {
    color: #999
}

.w-input::-moz-placeholder,
.w-select::-moz-placeholder {
    color: #999;
    opacity: 1
}

.w-input:-ms-input-placeholder,
.w-select:-ms-input-placeholder {
    color: #999
}

.w-input::-webkit-input-placeholder,
.w-select::-webkit-input-placeholder {
    color: #999
}

.w-input:focus,
.w-select:focus {
    border-color: #3898EC;
    outline: 0
}

.w-input[disabled],
.w-select[disabled],
.w-input[readonly],
.w-select[readonly],
fieldset[disabled] .w-input,
fieldset[disabled] .w-select {
    cursor: not-allowed;
    background-color: #eeeeee
}

textarea.w-input,
textarea.w-select {
    height: auto
}

.w-select {
    background-color: #f3f3f3
}

.w-select[multiple] {
    height: auto
}

.w-form-label {
    display: inline-block;
    cursor: pointer;
    font-weight: normal;
    margin-bottom: 0
}

.w-radio {
    display: block;
    margin-bottom: 5px;
    padding-left: 20px
}

.w-radio:before,
.w-radio:after {
    content: " ";
    display: table;
    grid-column-start: 1;
    grid-row-start: 1;
    grid-column-end: 2;
    grid-row-end: 2
}

.w-radio:after {
    clear: both
}

.w-radio-input {
    margin: 4px 0 0;
    margin-top: 1px \9;
    line-height: normal;
    float: left;
    margin-left: -20px
}

.w-radio-input {
    margin-top: 3px
}

.w-file-upload {
    display: block;
    margin-bottom: 10px
}

.w-file-upload-input {
    width: .1px;
    height: .1px;
    opacity: 0;
    overflow: hidden;
    position: absolute;
    z-index: -100
}

.w-file-upload-default,
.w-file-upload-uploading,
.w-file-upload-success {
    display: inline-block;
    color: #333333
}

.w-file-upload-error {
    display: block;
    margin-top: 10px
}

.w-file-upload-default.w-hidden,
.w-file-upload-uploading.w-hidden,
.w-file-upload-error.w-hidden,
.w-file-upload-success.w-hidden {
    display: none
}

.w-file-upload-uploading-btn {
    display: flex;
    font-size: 14px;
    font-weight: normal;
    cursor: pointer;
    margin: 0;
    padding: 8px 12px;
    border: 1px solid #cccccc;
    background-color: #fafafa
}

.w-file-upload-file {
    display: flex;
    flex-grow: 1;
    justify-content: space-between;
    margin: 0;
    padding: 8px 9px 8px 11px;
    border: 1px solid #cccccc;
    background-color: #fafafa
}

.w-file-upload-file-name {
    font-size: 14px;
    font-weight: normal;
    display: block
}

.w-file-remove-link {
    margin-top: 3px;
    margin-left: 10px;
    width: auto;
    height: auto;
    padding: 3px;
    display: block;
    cursor: pointer
}

.w-icon-file-upload-remove {
    margin: auto;
    font-size: 10px
}

.w-file-upload-error-msg {
    display: inline-block;
    color: #ea384c;
    padding: 2px 0
}

.w-file-upload-info {
    display: inline-block;
    line-height: 38px;
    padding: 0 12px
}

.w-file-upload-label {
    display: inline-block;
    font-size: 14px;
    font-weight: normal;
    cursor: pointer;
    margin: 0;
    padding: 8px 12px;
    border: 1px solid #cccccc;
    background-color: #fafafa
}

.w-icon-file-upload-icon,
.w-icon-file-upload-uploading {
    display: inline-block;
    margin-right: 8px;
    width: 20px
}

.w-icon-file-upload-uploading {
    height: 20px
}

.w-container {
    margin-left: auto;
    margin-right: auto;
    max-width: 1080px
}

.w-container:before,
.w-container:after {
    content: " ";
    display: table;
    grid-column-start: 1;
    grid-row-start: 1;
    grid-column-end: 2;
    grid-row-end: 2
}

.w-container:after {
    clear: both
}

.w-container .w-row {
    margin-left: -10px;
    margin-right: -10px
}

.w-row:before,
.w-row:after {
    content: " ";
    display: table;
    grid-column-start: 1;
    grid-row-start: 1;
    grid-column-end: 2;
    grid-row-end: 2
}

.w-row:after {
    clear: both
}

.w-row .w-row {
    margin-left: 0;
    margin-right: 0
}

.w-col {
    position: relative;
    float: left;
    width: 100%;
    min-height: 1px;
    padding-left: 10px;
    padding-right: 10px
}

.w-col .w-col {
    padding-left: 0;
    padding-right: 0
}

.w-col-1 {
    width: 8.33333333%
}

.w-col-2 {
    width: 16.66666667%
}

.w-col-3 {
    width: 25%
}

.w-col-4 {
    width: 33.33333333%
}

.w-col-5 {
    width: 41.66666667%
}

.w-col-6 {
    width: 50%
}

.w-col-7 {
    width: 58.33333333%
}

.w-col-8 {
    width: 66.66666667%
}

.w-col-9 {
    width: 75%
}

.w-col-10 {
    width: 83.33333333%
}

.w-col-11 {
    width: 91.66666667%
}

.w-col-12 {
    width: 100%
}

.w-hidden-main {
    display: none !important
}

@media screen and (max-width:991px) {
    .w-container {
        max-width: 728px
    }

    .w-hidden-main {
        display: inherit !important
    }

    .w-hidden-medium {
        display: none !important
    }

    .w-col-medium-1 {
        width: 8.33333333%
    }

    .w-col-medium-2 {
        width: 16.66666667%
    }

    .w-col-medium-3 {
        width: 25%
    }

    .w-col-medium-4 {
        width: 33.33333333%
    }

    .w-col-medium-5 {
        width: 41.66666667%
    }

    .w-col-medium-6 {
        width: 50%
    }

    .w-col-medium-7 {
        width: 58.33333333%
    }

    .w-col-medium-8 {
        width: 66.66666667%
    }

    .w-col-medium-9 {
        width: 75%
    }

    .w-col-medium-10 {
        width: 83.33333333%
    }

    .w-col-medium-11 {
        width: 91.66666667%
    }

    .w-col-medium-12 {
        width: 100%
    }

    .w-col-stack {
        width: 100%;
        left: auto;
        right: auto
    }
}

@media screen and (max-width:767px) {
    .w-hidden-main {
        display: inherit !important
    }

    .w-hidden-medium {
        display: inherit !important
    }

    .w-hidden-small {
        display: none !important
    }

    .w-row,
    .w-container .w-row {
        margin-left: 0;
        margin-right: 0
    }

    .w-col {
        width: 100%;
        left: auto;
        right: auto
    }

    .w-col-small-1 {
        width: 8.33333333%
    }

    .w-col-small-2 {
        width: 16.66666667%
    }

    .w-col-small-3 {
        width: 25%
    }

    .w-col-small-4 {
        width: 33.33333333%
    }

    .w-col-small-5 {
        width: 41.66666667%
    }

    .w-col-small-6 {
        width: 50%
    }

    .w-col-small-7 {
        width: 58.33333333%
    }

    .w-col-small-8 {
        width: 66.66666667%
    }

    .w-col-small-9 {
        width: 75%
    }

    .w-col-small-10 {
        width: 83.33333333%
    }

    .w-col-small-11 {
        width: 91.66666667%
    }

    .w-col-small-12 {
        width: 100%
    }
}

@media screen and (max-width:479px) {
    .w-container {
        max-width: none
    }

    .w-hidden-main {
        display: inherit !important
    }

    .w-hidden-medium {
        display: inherit !important
    }

    .w-hidden-small {
        display: inherit !important
    }

    .w-hidden-tiny {
        display: none !important
    }

    .w-col {
        width: 100%
    }

    .w-col-tiny-1 {
        width: 8.33333333%
    }

    .w-col-tiny-2 {
        width: 16.66666667%
    }

    .w-col-tiny-3 {
        width: 25%
    }

    .w-col-tiny-4 {
        width: 33.33333333%
    }

    .w-col-tiny-5 {
        width: 41.66666667%
    }

    .w-col-tiny-6 {
        width: 50%
    }

    .w-col-tiny-7 {
        width: 58.33333333%
    }

    .w-col-tiny-8 {
        width: 66.66666667%
    }

    .w-col-tiny-9 {
        width: 75%
    }

    .w-col-tiny-10 {
        width: 83.33333333%
    }

    .w-col-tiny-11 {
        width: 91.66666667%
    }

    .w-col-tiny-12 {
        width: 100%
    }
}

.w-widget {
    position: relative
}

.w-widget-map {
    width: 100%;
    height: 400px
}

.w-widget-map label {
    width: auto;
    display: inline
}

.w-widget-map img {
    max-width: inherit
}

.w-widget-map .gm-style-iw {
    text-align: center
}

.w-widget-map .gm-style-iw>button {
    display: none !important
}

.w-widget-twitter {
    overflow: hidden
}

.w-widget-twitter-count-shim {
    display: inline-block;
    vertical-align: top;
    position: relative;
    width: 28px;
    height: 20px;
    text-align: center;
    background: white;
    border: #758696 solid 1px;
    border-radius: 3px
}

.w-widget-twitter-count-shim * {
    pointer-events: none;
    -webkit-user-select: none;
    -moz-user-select: none;
    -ms-user-select: none;
    user-select: none
}

.w-widget-twitter-count-shim .w-widget-twitter-count-inner {
    position: relative;
    font-size: 15px;
    line-height: 12px;
    text-align: center;
    color: #999;
    font-family: serif
}

.w-widget-twitter-count-shim .w-widget-twitter-count-clear {
    position: relative;
    display: block
}

.w-widget-twitter-count-shim.w--large {
    width: 36px;
    height: 28px
}

.w-widget-twitter-count-shim.w--large .w-widget-twitter-count-inner {
    font-size: 18px;
    line-height: 18px
}

.w-widget-twitter-count-shim:not(.w--vertical) {
    margin-left: 5px;
    margin-right: 8px
}

.w-widget-twitter-count-shim:not(.w--vertical).w--large {
    margin-left: 6px
}

.w-widget-twitter-count-shim:not(.w--vertical):before,
.w-widget-twitter-count-shim:not(.w--vertical):after {
    top: 50%;
    left: 0;
    border: solid transparent;
    content: " ";
    height: 0;
    width: 0;
    position: absolute;
    pointer-events: none
}

.w-widget-twitter-count-shim:not(.w--vertical):before {
    border-color: rgba(117, 134, 150, 0);
    border-right-color: #5d6c7b;
    border-width: 4px;
    margin-left: -9px;
    margin-top: -4px
}

.w-widget-twitter-count-shim:not(.w--vertical).w--large:before {
    border-width: 5px;
    margin-left: -10px;
    margin-top: -5px
}

.w-widget-twitter-count-shim:not(.w--vertical):after {
    border-color: rgba(255, 255, 255, 0);
    border-right-color: white;
    border-width: 4px;
    margin-left: -8px;
    margin-top: -4px
}

.w-widget-twitter-count-shim:not(.w--vertical).w--large:after {
    border-width: 5px;
    margin-left: -9px;
    margin-top: -5px
}

.w-widget-twitter-count-shim.w--vertical {
    width: 61px;
    height: 33px;
    margin-bottom: 8px
}

.w-widget-twitter-count-shim.w--vertical:before,
.w-widget-twitter-count-shim.w--vertical:after {
    top: 100%;
    left: 50%;
    border: solid transparent;
    content: " ";
    height: 0;
    width: 0;
    position: absolute;
    pointer-events: none
}

.w-widget-twitter-count-shim.w--vertical:before {
    border-color: rgba(117, 134, 150, 0);
    border-top-color: #5d6c7b;
    border-width: 5px;
    margin-left: -5px
}

.w-widget-twitter-count-shim.w--vertical:after {
    border-color: rgba(255, 255, 255, 0);
    border-top-color: white;
    border-width: 4px;
    margin-left: -4px
}

.w-widget-twitter-count-shim.w--vertical .w-widget-twitter-count-inner {
    font-size: 18px;
    line-height: 22px
}

.w-widget-twitter-count-shim.w--vertical.w--large {
    width: 76px
}

.w-widget-gplus {
    overflow: hidden
}

.w-background-video {
    position: relative;
    overflow: hidden;
    height: 500px;
    color: white
}

.w-background-video>video {
    background-size: cover;
    background-position: 50% 50%;
    position: absolute;
    margin: auto;
    width: 100%;
    height: 100%;
    right: -100%;
    bottom: -100%;
    top: -100%;
    left: -100%;
    object-fit: cover;
    z-index: -100
}

.w-background-video>video::-webkit-media-controls-start-playback-button {
    display: none !important;
    -webkit-appearance: none
}

.w-slider {
    position: relative;
    height: 300px;
    text-align: center;
    background: #dddddd;
    clear: both;
    -webkit-tap-highlight-color: rgba(0, 0, 0, 0);
    tap-highlight-color: rgba(0, 0, 0, 0)
}

.w-slider-mask {
    position: relative;
    display: block;
    overflow: hidden;
    z-index: 1;
    left: 0;
    right: 0;
    height: 100%;
    white-space: nowrap
}

.w-slide {
    position: relative;
    display: inline-block;
    vertical-align: top;
    width: 100%;
    height: 100%;
    white-space: normal;
    text-align: left
}

.w-slider-nav {
    position: absolute;
    z-index: 2;
    top: auto;
    right: 0;
    bottom: 0;
    left: 0;
    margin: auto;
    padding-top: 10px;
    height: 40px;
    text-align: center;
    -webkit-tap-highlight-color: rgba(0, 0, 0, 0);
    tap-highlight-color: rgba(0, 0, 0, 0)
}

.w-slider-nav.w-round>div {
    border-radius: 100%
}

.w-slider-nav.w-num>div {
    width: auto;
    height: auto;
    padding: .2em .5em;
    font-size: inherit;
    line-height: inherit
}

.w-slider-nav.w-shadow>div {
    box-shadow: 0 0 3px rgba(51, 51, 51, 0.4)
}

.w-slider-nav-invert {
    color: #fff
}

.w-slider-nav-invert>div {
    background-color: rgba(34, 34, 34, 0.4)
}

.w-slider-nav-invert>div.w-active {
    background-color: #222
}

.w-slider-dot {
    position: relative;
    display: inline-block;
    width: 1em;
    height: 1em;
    background-color: rgba(255, 255, 255, 0.4);
    cursor: pointer;
    margin: 0 3px .5em;
    transition: background-color 100ms, color 100ms
}

.w-slider-dot.w-active {
    background-color: #fff
}

.w-slider-arrow-left,
.w-slider-arrow-right {
    position: absolute;
    width: 80px;
    top: 0;
    right: 0;
    bottom: 0;
    left: 0;
    margin: auto;
    cursor: pointer;
    overflow: hidden;
    color: white;
    font-size: 40px;
    -webkit-tap-highlight-color: rgba(0, 0, 0, 0);
    tap-highlight-color: rgba(0, 0, 0, 0);
    -webkit-user-select: none;
    -moz-user-select: none;
    -ms-user-select: none;
    user-select: none
}

.w-slider-arrow-left [class^="w-icon-"],
.w-slider-arrow-right [class^="w-icon-"],
.w-slider-arrow-left [class*=" w-icon-"],
.w-slider-arrow-right [class*=" w-icon-"] {
    position: absolute
}

.w-slider-arrow-left {
    z-index: 3;
    right: auto
}

.w-slider-arrow-right {
    z-index: 4;
    left: auto
}

.w-icon-slider-left,
.w-icon-slider-right {
    top: 0;
    right: 0;
    bottom: 0;
    left: 0;
    margin: auto;
    width: 1em;
    height: 1em
}

.w-dropdown {
    display: inline-block;
    position: relative;
    text-align: left;
    margin-left: auto;
    margin-right: auto;
    z-index: 900
}

.w-dropdown-btn,
.w-dropdown-toggle,
.w-dropdown-link {
    position: relative;
    vertical-align: top;
    text-decoration: none;
    color: #222222;
    padding: 20px;
    text-align: left;
    margin-left: auto;
    margin-right: auto;
    white-space: nowrap
}

.w-dropdown-toggle {
    -webkit-user-select: none;
    -moz-user-select: none;
    -ms-user-select: none;
    user-select: none;
    display: inline-block;
    cursor: pointer;
    padding-right: 40px
}

.w-dropdown-toggle:focus {
    outline: 0
}

.w-icon-dropdown-toggle {
    position: absolute;
    top: 0;
    right: 0;
    bottom: 0;
    margin: auto;
    margin-right: 20px;
    width: 1em;
    height: 1em
}

.w-dropdown-list {
    position: absolute;
    background: #dddddd;
    display: none;
    min-width: 100%
}

.w-dropdown-list.w--open {
    display: block
}

.w-dropdown-link {
    padding: 10px 20px;
    display: block;
    color: #222222
}

.w-dropdown-link.w--current {
    color: #0082f3
}

.w-dropdown-link:focus {
    outline: 0
}

@media screen and (max-width:767px) {
    .w-nav-brand {
        padding-left: 10px
    }
}

.w-lightbox-backdrop {
    color: #000;
    cursor: auto;
    font-family: serif;
    font-size: medium;
    font-style: normal;
    font-variant: normal;
    font-weight: normal;
    letter-spacing: normal;
    line-height: normal;
    list-style: disc;
    text-align: start;
    text-indent: 0;
    text-shadow: none;
    text-transform: none;
    visibility: visible;
    white-space: normal;
    word-break: normal;
    word-spacing: normal;
    word-wrap: normal;
    position: fixed;
    top: 0;
    right: 0;
    bottom: 0;
    left: 0;
    color: #fff;
    font-family: "Helvetica Neue", Helvetica, Ubuntu, "Segoe UI", Verdana, sans-serif;
    font-size: 17px;
    line-height: 1.2;
    font-weight: 300;
    text-align: center;
    background: rgba(0, 0, 0, 0.9);
    z-index: 2000;
    outline: 0;
    opacity: 0;
    -webkit-user-select: none;
    -moz-user-select: none;
    -ms-user-select: none;
    -webkit-tap-highlight-color: transparent;
    -webkit-transform: translate(0, 0)
}

.w-lightbox-backdrop,
.w-lightbox-container {
    height: 100%;
    overflow: auto;
    -webkit-overflow-scrolling: touch
}

.w-lightbox-content {
    position: relative;
    height: 100vh;
    overflow: hidden
}

.w-lightbox-view {
    position: absolute;
    width: 100vw;
    height: 100vh;
    opacity: 0
}

.w-lightbox-view:before {
    content: "";
    height: 100vh
}

.w-lightbox-group,
.w-lightbox-group .w-lightbox-view,
.w-lightbox-group .w-lightbox-view:before {
    height: 86vh
}

.w-lightbox-frame,
.w-lightbox-view:before {
    display: inline-block;
    vertical-align: middle
}

.w-lightbox-figure {
    position: relative;
    margin: 0
}

.w-lightbox-group .w-lightbox-figure {
    cursor: pointer
}

.w-lightbox-img {
    width: auto;
    height: auto;
    max-width: none
}

.w-lightbox-image {
    display: block;
    float: none;
    max-width: 100vw;
    max-height: 100vh
}

.w-lightbox-group .w-lightbox-image {
    max-height: 86vh
}

.w-lightbox-caption {
    position: absolute;
    right: 0;
    bottom: 0;
    left: 0;
    padding: .5em 1em;
    background: rgba(0, 0, 0, 0.4);
    text-align: left;
    text-overflow: ellipsis;
    white-space: nowrap;
    overflow: hidden
}

.w-lightbox-embed {
    position: absolute;
    top: 0;
    right: 0;
    bottom: 0;
    left: 0;
    width: 100%;
    height: 100%
}

.w-lightbox-control {
    position: absolute;
    top: 0;
    width: 4em;
    background-size: 24px;
    background-repeat: no-repeat;
    background-position: center;
    cursor: pointer;
    -webkit-transition: all .3s;
    transition: all .3s
}

.w-lightbox-left {
    display: none;
    bottom: 0;
    left: 0;
    background-image: url("data:image/svg+xml;base64,PHN2ZyB4bWxucz0iaHR0cDovL3d3dy53My5vcmcvMjAwMC9zdmciIHZpZXdCb3g9Ii0yMCAwIDI0IDQwIiB3aWR0aD0iMjQiIGhlaWdodD0iNDAiPjxnIHRyYW5zZm9ybT0icm90YXRlKDQ1KSI+PHBhdGggZD0ibTAgMGg1djIzaDIzdjVoLTI4eiIgb3BhY2l0eT0iLjQiLz48cGF0aCBkPSJtMSAxaDN2MjNoMjN2M2gtMjZ6IiBmaWxsPSIjZmZmIi8+PC9nPjwvc3ZnPg==")
}

.w-lightbox-right {
    display: none;
    right: 0;
    bottom: 0;
    background-image: url("data:image/svg+xml;base64,PHN2ZyB4bWxucz0iaHR0cDovL3d3dy53My5vcmcvMjAwMC9zdmciIHZpZXdCb3g9Ii00IDAgMjQgNDAiIHdpZHRoPSIyNCIgaGVpZ2h0PSI0MCI+PGcgdHJhbnNmb3JtPSJyb3RhdGUoNDUpIj48cGF0aCBkPSJtMC0waDI4djI4aC01di0yM2gtMjN6IiBvcGFjaXR5PSIuNCIvPjxwYXRoIGQ9Im0xIDFoMjZ2MjZoLTN2LTIzaC0yM3oiIGZpbGw9IiNmZmYiLz48L2c+PC9zdmc+")
}

.w-lightbox-close {
    right: 0;
    height: 2.6em;
    background-image: url("data:image/svg+xml;base64,PHN2ZyB4bWxucz0iaHR0cDovL3d3dy53My5vcmcvMjAwMC9zdmciIHZpZXdCb3g9Ii00IDAgMTggMTciIHdpZHRoPSIxOCIgaGVpZ2h0PSIxNyI+PGcgdHJhbnNmb3JtPSJyb3RhdGUoNDUpIj48cGF0aCBkPSJtMCAwaDd2LTdoNXY3aDd2NWgtN3Y3aC01di03aC03eiIgb3BhY2l0eT0iLjQiLz48cGF0aCBkPSJtMSAxaDd2LTdoM3Y3aDd2M2gtN3Y3aC0zdi03aC03eiIgZmlsbD0iI2ZmZiIvPjwvZz48L3N2Zz4=");
    background-size: 18px
}

.w-lightbox-strip {
    position: absolute;
    bottom: 0;
    left: 0;
    right: 0;
    padding: 0 1vh;
    line-height: 0;
    white-space: nowrap;
    overflow-x: auto;
    overflow-y: hidden
}

.w-lightbox-item {
    display: inline-block;
    width: 10vh;
    padding: 2vh 1vh;
    box-sizing: content-box;
    cursor: pointer;
    -webkit-transform: translate3d(0, 0, 0)
}

.w-lightbox-active {
    opacity: .3
}

.w-lightbox-thumbnail {
    position: relative;
    height: 10vh;
    background: #222;
    overflow: hidden
}

.w-lightbox-thumbnail-image {
    position: absolute;
    top: 0;
    left: 0
}

.w-lightbox-thumbnail .w-lightbox-tall {
    top: 50%;
    width: 100%;
    -webkit-transform: translate(0, -50%);
    -ms-transform: translate(0, -50%);
    transform: translate(0, -50%)
}

.w-lightbox-thumbnail .w-lightbox-wide {
    left: 50%;
    height: 100%;
    -webkit-transform: translate(-50%, 0);
    -ms-transform: translate(-50%, 0);
    transform: translate(-50%, 0)
}

.w-lightbox-spinner {
    position: absolute;
    top: 50%;
    left: 50%;
    box-sizing: border-box;
    width: 40px;
    height: 40px;
    margin-top: -20px;
    margin-left: -20px;
    border: 5px solid rgba(0, 0, 0, 0.4);
    border-radius: 50%;
    -webkit-animation: spin .8s infinite linear;
    animation: spin .8s infinite linear
}

.w-lightbox-spinner:after {
    content: "";
    position: absolute;
    top: -4px;
    right: -4px;
    bottom: -4px;
    left: -4px;
    border: 3px solid transparent;
    border-bottom-color: #fff;
    border-radius: 50%
}

.w-lightbox-hide {
    display: none
}

.w-lightbox-noscroll {
    overflow: hidden
}

@media (min-width:768px) {
    .w-lightbox-content {
        height: 96vh;
        margin-top: 2vh
    }

    .w-lightbox-view,
    .w-lightbox-view:before {
        height: 96vh
    }

    .w-lightbox-group,
    .w-lightbox-group .w-lightbox-view,
    .w-lightbox-group .w-lightbox-view:before {
        height: 84vh
    }

    .w-lightbox-image {
        max-width: 96vw;
        max-height: 96vh
    }

    .w-lightbox-group .w-lightbox-image {
        max-width: 82.3vw;
        max-height: 84vh
    }

    .w-lightbox-left,
    .w-lightbox-right {
        display: block;
        opacity: .5
    }

    .w-lightbox-close {
        opacity: .8
    }

    .w-lightbox-control:hover {
        opacity: 1
    }
}

.w-lightbox-inactive,
.w-lightbox-inactive:hover {
    opacity: 0
}

.w-richtext:before,
.w-richtext:after {
    content: " ";
    display: table;
    grid-column-start: 1;
    grid-row-start: 1;
    grid-column-end: 2;
    grid-row-end: 2
}

.w-richtext:after {
    clear: both
}

.w-richtext[contenteditable="true"]:before,
.w-richtext[contenteditable="true"]:after {
    white-space: initial
}

.w-richtext ol,
.w-richtext ul {
    overflow: hidden
}

.w-richtext .w-richtext-figure-selected.w-richtext-figure-type-video div:after,
.w-richtext .w-richtext-figure-selected[data-rt-type="video"] div:after {
    outline: 2px solid #2895f7
}

.w-richtext .w-richtext-figure-selected.w-richtext-figure-type-image div,
.w-richtext .w-richtext-figure-selected[data-rt-type="image"] div {
    outline: 2px solid #2895f7
}

.w-richtext figure.w-richtext-figure-type-video>div:after,
.w-richtext figure[data-rt-type="video"]>div:after {
    content: '';
    position: absolute;
    display: none;
    left: 0;
    top: 0;
    right: 0;
    bottom: 0
}

.w-richtext figure {
    position: relative;
    max-width: 60%
}

.w-richtext figure>div:before {
    cursor: default !important
}

.w-richtext figure img {
    width: 100%
}

.w-richtext figure figcaption.w-richtext-figcaption-placeholder {
    opacity: .6
}

.w-richtext figure div {
    font-size: 0;
    color: transparent
}

.w-richtext figure.w-richtext-figure-type-image,
.w-richtext figure[data-rt-type="image"] {
    display: table
}

.w-richtext figure.w-richtext-figure-type-image>div,
.w-richtext figure[data-rt-type="image"]>div {
    display: inline-block
}

.w-richtext figure.w-richtext-figure-type-image>figcaption,
.w-richtext figure[data-rt-type="image"]>figcaption {
    display: table-caption;
    caption-side: bottom
}

.w-richtext figure.w-richtext-figure-type-video,
.w-richtext figure[data-rt-type="video"] {
    width: 60%;
    height: 0
}

.w-richtext figure.w-richtext-figure-type-video iframe,
.w-richtext figure[data-rt-type="video"] iframe {
    position: absolute;
    top: 0;
    left: 0;
    width: 100%;
    height: 100%
}

.w-richtext figure.w-richtext-figure-type-video>div,
.w-richtext figure[data-rt-type="video"]>div {
    width: 100%
}

.w-richtext figure.w-richtext-align-center {
    margin-right: auto;
    margin-left: auto;
    clear: both
}

.w-richtext figure.w-richtext-align-center.w-richtext-figure-type-image>div,
.w-richtext figure.w-richtext-align-center[data-rt-type="image"]>div {
    max-width: 100%
}

.w-richtext figure.w-richtext-align-normal {
    clear: both
}

.w-richtext figure.w-richtext-align-fullwidth {
    width: 100%;
    max-width: 100%;
    text-align: center;
    clear: both;
    display: block;
    margin-right: auto;
    margin-left: auto
}

.w-richtext figure.w-richtext-align-fullwidth>div {
    display: inline-block;
    padding-bottom: inherit
}

.w-richtext figure.w-richtext-align-fullwidth>figcaption {
    display: block
}

.w-richtext figure.w-richtext-align-floatleft {
    float: left;
    margin-right: 15px;
    clear: none
}

.w-richtext figure.w-richtext-align-floatright {
    float: right;
    margin-left: 15px;
    clear: none
}

.w-nav {
    position: relative;
    background: #dddddd;
    z-index: 1000
}

.w-nav:before,
.w-nav:after {
    content: " ";
    display: table;
    grid-column-start: 1;
    grid-row-start: 1;
    grid-column-end: 2;
    grid-row-end: 2
}

.w-nav:after {
    clear: both
}

.w-nav-brand {
    position: relative;
    float: left;
    text-decoration: none;
    color: #333333
}

.w-nav-link {
    position: relative;
    display: inline-block;
    vertical-align: top;
    text-decoration: none;
    color: #222222;
    padding: 20px;
    text-align: left;
    margin-left: auto;
    margin-right: auto
}

.w-nav-link.w--current {
    color: #0082f3
}

.w-nav-menu {
    position: relative;
    float: right
}

[data-nav-menu-open] {
    display: block !important;
    position: absolute;
    top: 100%;
    left: 0;
    right: 0;
    background: #C8C8C8;
    text-align: center;
    overflow: visible;
    min-width: 200px
}

.w--nav-link-open {
    display: block;
    position: relative
}

.w-nav-overlay {
    position: absolute;
    overflow: hidden;
    display: none;
    top: 100%;
    left: 0;
    right: 0;
    width: 100%
}

.w-nav-overlay [data-nav-menu-open] {
    top: 0
}

.w-nav[data-animation="over-left"] .w-nav-overlay {
    width: auto
}

.w-nav[data-animation="over-left"] .w-nav-overlay,
.w-nav[data-animation="over-left"] [data-nav-menu-open] {
    right: auto;
    z-index: 1;
    top: 0
}

.w-nav[data-animation="over-right"] .w-nav-overlay {
    width: auto
}

.w-nav[data-animation="over-right"] .w-nav-overlay,
.w-nav[data-animation="over-right"] [data-nav-menu-open] {
    left: auto;
    z-index: 1;
    top: 0
}

.w-nav-button {
    position: relative;
    float: right;
    padding: 18px;
    font-size: 24px;
    display: none;
    cursor: pointer;
    -webkit-tap-highlight-color: rgba(0, 0, 0, 0);
    tap-highlight-color: rgba(0, 0, 0, 0);
    -webkit-user-select: none;
    -moz-user-select: none;
    -ms-user-select: none;
    user-select: none
}

.w-nav-button:focus {
    outline: 0
}

.w-nav-button.w--open {
    background-color: #C8C8C8;
    color: white
}

.w-nav[data-collapse="all"] .w-nav-menu {
    display: none
}

.w-nav[data-collapse="all"] .w-nav-button {
    display: block
}

.w--nav-dropdown-open {
    display: block
}

.w--nav-dropdown-toggle-open {
    display: block
}

.w--nav-dropdown-list-open {
    position: static
}

@media screen and (max-width:991px) {
    .w-nav[data-collapse="medium"] .w-nav-menu {
        display: none
    }

    .w-nav[data-collapse="medium"] .w-nav-button {
        display: block
    }
}

@media screen and (max-width:767px) {
    .w-nav[data-collapse="small"] .w-nav-menu {
        display: none
    }

    .w-nav[data-collapse="small"] .w-nav-button {
        display: block
    }

    .w-nav-brand {
        padding-left: 10px
    }
}

@media screen and (max-width:479px) {
    .w-nav[data-collapse="tiny"] .w-nav-menu {
        display: none
    }

    .w-nav[data-collapse="tiny"] .w-nav-button {
        display: block
    }
}

.w-tabs {
    position: relative
}

.w-tabs:before,
.w-tabs:after {
    content: " ";
    display: table;
    grid-column-start: 1;
    grid-row-start: 1;
    grid-column-end: 2;
    grid-row-end: 2
}

.w-tabs:after {
    clear: both
}

.w-tab-menu {
    position: relative
}

.w-tab-link {
    position: relative;
    display: inline-block;
    vertical-align: top;
    text-decoration: none;
    padding: 9px 30px;
    text-align: left;
    cursor: pointer;
    color: #222222;
    background-color: #dddddd
}

.w-tab-link.w--current {
    background-color: #C8C8C8
}

.w-tab-link:focus {
    outline: 0
}

.w-tab-content {
    position: relative;
    display: block;
    overflow: hidden
}

.w-tab-pane {
    position: relative;
    display: none
}

.w--tab-active {
    display: block
}

@media screen and (max-width:479px) {
    .w-tab-link {
        display: block
    }
}

.w-ix-emptyfix:after {
    content: ""
}

@keyframes spin {
    0% {
        transform: rotate(0deg)
    }

    100% {
        transform: rotate(360deg)
    }
}

.w-dyn-empty {
    padding: 10px;
    background-color: #dddddd
}

.w-dyn-hide {
    display: none !important
}

.w-dyn-bind-empty {
    display: none !important
}

.w-condition-invisible {
    display: none !important
}

/* ==========================================================================
   Start of custom Webflow CSS
   ========================================================================== */

a {
    color: hsla(254, 31%, 49%, 1.00);
}

.section {
    margin-bottom: 0px;
    padding-top: 100px;
    background-color: hsla(254, 31%, 49%, 1.00);
}

.papertitle {
    margin-bottom: 20px;
    color: hsla(0, 0%, 100%, 1.00);
    text-align: center;
}


.text-block {
    overflow: visible;
    margin-bottom: 30px;
    border-top-style: solid;
    border-top-width: 1px;
    border-top-color: transparent;
    border-right-style: solid;
    border-right-width: 1px;
    border-right-color: transparent;
    border-bottom-style: solid;
    border-bottom-width: 1px;
    border-bottom-color: transparent;
    border-left-style: solid;
    border-left-width: 1px;
    border-left-color: transparent;
    color: hsla(0, 0.00%, 100.00%, 1.00);
    font-size: 25px;
    text-align: center;
}


.container-3 {
    margin-bottom: 0px;
}


.section-2 {
    background-color: hsla(215.2380952380952, 0.00%, 100.00%, 0.50);
    color: hsla(212, 0.00%, 0.00%, 1.00);
    font-size: 10px;
}

.list {
    display: block;
    padding-top: 5px;
    padding-bottom: 5px;
    padding-left: 10px;
    color: hsla(210.19607843137254, 100.00%, 30.00%, 1.00);
    font-size: 20px;
    text-decoration: underline;
}

.container {
    margin-top: 10px;
    margin-bottom: 10px;
}

.list-item {
    /* padding-bottom: 10px; */
    list-style-type: disc;
}


.list-item-4 {
    padding-bottom: 0px;
    color: #004c99;
    text-decoration: underline;
}


.list-item-2 {
    padding-bottom: 0px;
    margin-top: 0px;
    list-style-type: none;
}


.list-item-3 {
    list-style-type: none;
}


.list-item-6 {
    padding-bottom: 10px;
}


.list-item-5 {
    text-decoration: underline;
}


.container-2 {
    margin-bottom: 0px;
}


.experimenttitle {
    margin-top: 30px;
    text-align: left;
}

.videoresult {
    /* height: 400px; */
    margin-bottom: 15px;
}


.video {
    height: 400px;
}


.column {
    height: 400px;
}

.heading-2 {
    /* font-style: italic; */
    font-size: 18px;
    margin-bottom: 0px;
    /* color: rgb(120, 120, 120); */
    font-weight: normal;
    text-align: center;
}

.heading-3 {
    font-style: italic;
    font-size: 18px;
    margin-bottom: 0px;
    color: rgb(120, 120, 120);
    font-weight: normal
}

.paragraph {
    font-size: 18px;
    text-align: justify;
}


.subexperimenttitle {
    /* margin-top: 25px; */
    font-size: 22px;
    margin-bottom: 10px;
}
