# Supplementary material
Source: ML conference proceedings conference paper supplement (https://proceedings.neurips.cc/paper_files/paper/2022/hash/1b3750390ca8b931fb9ca988647940cb-Abstract.html)
Supplement: Supplementary file 1 [file 1b3750390ca8b931fb9ca988647940cb-Supplemental-Conference.zip › supplemental/files/webfont.js]

/*
 * Copyright 2016 Small Batch, Inc.
 *
 * Licensed under the Apache License, Version 2.0 (the "License"); you may not
 * use this file except in compliance with the License. You may obtain a copy of
 * the License at
 *
 * http://www.apache.org/licenses/LICENSE-2.0
 *
 * Unless required by applicable law or agreed to in writing, software
 * distributed under the License is distributed on an "AS IS" BASIS, WITHOUT
 * WARRANTIES OR CONDITIONS OF ANY KIND, either express or implied. See the
 * License for the specific language governing permissions and limitations under
 * the License.
 */
/* Web Font Loader v1.6.26 - (c) Adobe Systems, Google. License: Apache 2.0 */(function(){function aa(a,b,c){return a.call.apply(a.bind,arguments)}function ba(a,b,c){if(!a)throw Error();if(2<arguments.length){var d=Array.prototype.slice.call(arguments,2);return function(){var c=Array.prototype.slice.call(arguments);Array.prototype.unshift.apply(c,d);return a.apply(b,c)}}return function(){return a.apply(b,arguments)}}function p(a,b,c){p=Function.prototype.bind&&-1!=Function.prototype.bind.toString().indexOf("native code")?aa:ba;return p.apply(null,arguments)}var q=Date.now||function(){return+new Date};function ca(a,b){this.a=a;this.m=b||a;this.c=this.m.document}var da=!!window.FontFace;function t(a,b,c,d){b=a.c.createElement(b);if(c)for(var e in c)c.hasOwnProperty(e)&&("style"==e?b.style.cssText=c[e]:b.setAttribute(e,c[e]));d&&b.appendChild(a.c.createTextNode(d));return b}function u(a,b,c){a=a.c.getElementsByTagName(b)[0];a||(a=document.documentElement);a.insertBefore(c,a.lastChild)}function v(a){a.parentNode&&a.parentNode.removeChild(a)}
function w(a,b,c){b=b||[];c=c||[];for(var d=a.className.split(/\s+/),e=0;e<b.length;e+=1){for(var f=!1,g=0;g<d.length;g+=1)if(b[e]===d[g]){f=!0;break}f||d.push(b[e])}b=[];for(e=0;e<d.length;e+=1){f=!1;for(g=0;g<c.length;g+=1)if(d[e]===c[g]){f=!0;break}f||b.push(d[e])}a.className=b.join(" ").replace(/\s+/g," ").replace(/^\s+|\s+$/,"")}function y(a,b){for(var c=a.className.split(/\s+/),d=0,e=c.length;d<e;d++)if(c[d]==b)return!0;return!1}
function z(a){if("string"===typeof a.f)return a.f;var b=a.m.location.protocol;"about:"==b&&(b=a.a.location.protocol);return"https:"==b?"https:":"http:"}function ea(a){return a.m.location.hostname||a.a.location.hostname}
function A(a,b,c){function d(){k&&e&&f&&(k(g),k=null)}b=t(a,"link",{rel:"stylesheet",href:b,media:"all"});var e=!1,f=!0,g=null,k=c||null;da?(b.onload=function(){e=!0;d()},b.onerror=function(){e=!0;g=Error("Stylesheet failed to load");d()}):setTimeout(function(){e=!0;d()},0);u(a,"head",b)}
function B(a,b,c,d){var e=a.c.getElementsByTagName("head")[0];if(e){var f=t(a,"script",{src:b}),g=!1;f.onload=f.onreadystatechange=function(){g||this.readyState&&"loaded"!=this.readyState&&"complete"!=this.readyState||(g=!0,c&&c(null),f.onload=f.onreadystatechange=null,"HEAD"==f.parentNode.tagName&&e.removeChild(f))};e.appendChild(f);setTimeout(function(){g||(g=!0,c&&c(Error("Script load timeout")))},d||5E3);return f}return null};function C(){this.a=0;this.c=null}function D(a){a.a++;return function(){a.a--;E(a)}}function F(a,b){a.c=b;E(a)}function E(a){0==a.a&&a.c&&(a.c(),a.c=null)};function G(a){this.a=a||"-"}G.prototype.c=function(a){for(var b=[],c=0;c<arguments.length;c++)b.push(arguments[c].replace(/[\W_]+/g,"").toLowerCase());return b.join(this.a)};function H(a,b){this.c=a;this.f=4;this.a="n";var c=(b||"n4").match(/^([nio])([1-9])$/i);c&&(this.a=c[1],this.f=parseInt(c[2],10))}function fa(a){return I(a)+" "+(a.f+"00")+" 300px "+J(a.c)}function J(a){var b=[];a=a.split(/,\s*/);for(var c=0;c<a.length;c++){var d=a[c].replace(/['"]/g,"");-1!=d.indexOf(" ")||/^\d/.test(d)?b.push("'"+d+"'"):b.push(d)}return b.join(",")}function K(a){return a.a+a.f}function I(a){var b="normal";"o"===a.a?b="oblique":"i"===a.a&&(b="italic");return b}
function ga(a){var b=4,c="n",d=null;a&&((d=a.match(/(normal|oblique|italic)/i))&&d[1]&&(c=d[1].substr(0,1).toLowerCase()),(d=a.match(/([1-9]00|normal|bold)/i))&&d[1]&&(/bold/i.test(d[1])?b=7:/[1-9]00/.test(d[1])&&(b=parseInt(d[1].substr(0,1),10))));return c+b};function ha(a,b){this.c=a;this.f=a.m.document.documentElement;this.h=b;this.a=new G("-");this.j=!1!==b.events;this.g=!1!==b.classes}function ia(a){a.g&&w(a.f,[a.a.c("wf","loading")]);L(a,"loading")}function M(a){if(a.g){var b=y(a.f,a.a.c("wf","active")),c=[],d=[a.a.c("wf","loading")];b||c.push(a.a.c("wf","inactive"));w(a.f,c,d)}L(a,"inactive")}function L(a,b,c){if(a.j&&a.h[b])if(c)a.h[b](c.c,K(c));else a.h[b]()};function ja(){this.c={}}function ka(a,b,c){var d=[],e;for(e in b)if(b.hasOwnProperty(e)){var f=a.c[e];f&&d.push(f(b[e],c))}return d};function N(a,b){this.c=a;this.f=b;this.a=t(this.c,"span",{"aria-hidden":"true"},this.f)}function O(a){u(a.c,"body",a.a)}function P(a){return"display:block;position:absolute;top:-9999px;left:-9999px;font-size:300px;width:auto;height:auto;line-height:normal;margin:0;padding:0;font-variant:normal;white-space:nowrap;font-family:"+J(a.c)+";"+("font-style:"+I(a)+";font-weight:"+(a.f+"00")+";")};function Q(a,b,c,d,e,f){this.g=a;this.j=b;this.a=d;this.c=c;this.f=e||3E3;this.h=f||void 0}Q.prototype.start=function(){var a=this.c.m.document,b=this,c=q(),d=new Promise(function(d,e){function k(){q()-c>=b.f?e():a.fonts.load(fa(b.a),b.h).then(function(a){1<=a.length?d():setTimeout(k,25)},function(){e()})}k()}),e=new Promise(function(a,d){setTimeout(d,b.f)});Promise.race([e,d]).then(function(){b.g(b.a)},function(){b.j(b.a)})};function R(a,b,c,d,e,f,g){this.v=a;this.B=b;this.c=c;this.a=d;this.s=g||"BESbswy";this.f={};this.w=e||3E3;this.u=f||null;this.o=this.j=this.h=this.g=null;this.g=new N(this.c,this.s);this.h=new N(this.c,this.s);this.j=new N(this.c,this.s);this.o=new N(this.c,this.s);a=new H(this.a.c+",serif",K(this.a));a=P(a);this.g.a.style.cssText=a;a=new H(this.a.c+",sans-serif",K(this.a));a=P(a);this.h.a.style.cssText=a;a=new H("serif",K(this.a));a=P(a);this.j.a.style.cssText=a;a=new H("sans-serif",K(this.a));a=
P(a);this.o.a.style.cssText=a;O(this.g);O(this.h);O(this.j);O(this.o)}var S={D:"serif",C:"sans-serif"},T=null;function U(){if(null===T){var a=/AppleWebKit\/([0-9]+)(?:\.([0-9]+))/.exec(window.navigator.userAgent);T=!!a&&(536>parseInt(a[1],10)||536===parseInt(a[1],10)&&11>=parseInt(a[2],10))}return T}R.prototype.start=function(){this.f.serif=this.j.a.offsetWidth;this.f["sans-serif"]=this.o.a.offsetWidth;this.A=q();la(this)};
function ma(a,b,c){for(var d in S)if(S.hasOwnProperty(d)&&b===a.f[S[d]]&&c===a.f[S[d]])return!0;return!1}function la(a){var b=a.g.a.offsetWidth,c=a.h.a.offsetWidth,d;(d=b===a.f.serif&&c===a.f["sans-serif"])||(d=U()&&ma(a,b,c));d?q()-a.A>=a.w?U()&&ma(a,b,c)&&(null===a.u||a.u.hasOwnProperty(a.a.c))?V(a,a.v):V(a,a.B):na(a):V(a,a.v)}function na(a){setTimeout(p(function(){la(this)},a),50)}function V(a,b){setTimeout(p(function(){v(this.g.a);v(this.h.a);v(this.j.a);v(this.o.a);b(this.a)},a),0)};function W(a,b,c){this.c=a;this.a=b;this.f=0;this.o=this.j=!1;this.s=c}var X=null;W.prototype.g=function(a){var b=this.a;b.g&&w(b.f,[b.a.c("wf",a.c,K(a).toString(),"active")],[b.a.c("wf",a.c,K(a).toString(),"loading"),b.a.c("wf",a.c,K(a).toString(),"inactive")]);L(b,"fontactive",a);this.o=!0;oa(this)};
W.prototype.h=function(a){var b=this.a;if(b.g){var c=y(b.f,b.a.c("wf",a.c,K(a).toString(),"active")),d=[],e=[b.a.c("wf",a.c,K(a).toString(),"loading")];c||d.push(b.a.c("wf",a.c,K(a).toString(),"inactive"));w(b.f,d,e)}L(b,"fontinactive",a);oa(this)};function oa(a){0==--a.f&&a.j&&(a.o?(a=a.a,a.g&&w(a.f,[a.a.c("wf","active")],[a.a.c("wf","loading"),a.a.c("wf","inactive")]),L(a,"active")):M(a.a))};function pa(a){this.j=a;this.a=new ja;this.h=0;this.f=this.g=!0}pa.prototype.load=function(a){this.c=new ca(this.j,a.context||this.j);this.g=!1!==a.events;this.f=!1!==a.classes;qa(this,new ha(this.c,a),a)};
function ra(a,b,c,d,e){var f=0==--a.h;(a.f||a.g)&&setTimeout(function(){var a=e||null,k=d||null||{};if(0===c.length&&f)M(b.a);else{b.f+=c.length;f&&(b.j=f);var h,m=[];for(h=0;h<c.length;h++){var l=c[h],n=k[l.c],r=b.a,x=l;r.g&&w(r.f,[r.a.c("wf",x.c,K(x).toString(),"loading")]);L(r,"fontloading",x);r=null;null===X&&(X=window.FontFace?(x=/Gecko.*Firefox\/(\d+)/.exec(window.navigator.userAgent))?42<parseInt(x[1],10):!0:!1);X?r=new Q(p(b.g,b),p(b.h,b),b.c,l,b.s,n):r=new R(p(b.g,b),p(b.h,b),b.c,l,b.s,a,
n);m.push(r)}for(h=0;h<m.length;h++)m[h].start()}},0)}function qa(a,b,c){var d=[],e=c.timeout;ia(b);var d=ka(a.a,c,a.c),f=new W(a.c,b,e);a.h=d.length;b=0;for(c=d.length;b<c;b++)d[b].load(function(b,d,c){ra(a,f,b,d,c)})};function sa(a,b){this.c=a;this.a=b}function ta(a,b,c){var d=z(a.c);a=(a.a.api||"fast.fonts.net/jsapi").replace(/^.*http(s?):(\/\/)?/,"");return d+"//"+a+"/"+b+".js"+(c?"?v="+c:"")}
sa.prototype.load=function(a){function b(){if(f["__mti_fntLst"+d]){var c=f["__mti_fntLst"+d](),e=[],h;if(c)for(var m=0;m<c.length;m++){var l=c[m].fontfamily;void 0!=c[m].fontStyle&&void 0!=c[m].fontWeight?(h=c[m].fontStyle+c[m].fontWeight,e.push(new H(l,h))):e.push(new H(l))}a(e)}else setTimeout(function(){b()},50)}var c=this,d=c.a.projectId,e=c.a.version;if(d){var f=c.c.m;B(this.c,ta(c,d,e),function(e){e?a([]):(f["__MonotypeConfiguration__"+d]=function(){return c.a},b())}).id="__MonotypeAPIScript__"+
d}else a([])};function ua(a,b){this.c=a;this.a=b}ua.prototype.load=function(a){var b,c,d=this.a.urls||[],e=this.a.families||[],f=this.a.testStrings||{},g=new C;b=0;for(c=d.length;b<c;b++)A(this.c,d[b],D(g));var k=[];b=0;for(c=e.length;b<c;b++)if(d=e[b].split(":"),d[1])for(var h=d[1].split(","),m=0;m<h.length;m+=1)k.push(new H(d[0],h[m]));else k.push(new H(d[0]));F(g,function(){a(k,f)})};function va(a,b,c){a?this.c=a:this.c=b+wa;this.a=[];this.f=[];this.g=c||""}var wa="//fonts.googleapis.com/css";function xa(a,b){for(var c=b.length,d=0;d<c;d++){var e=b[d].split(":");3==e.length&&a.f.push(e.pop());var f="";2==e.length&&""!=e[1]&&(f=":");a.a.push(e.join(f))}}
function ya(a){if(0==a.a.length)throw Error("No fonts to load!");if(-1!=a.c.indexOf("kit="))return a.c;for(var b=a.a.length,c=[],d=0;d<b;d++)c.push(a.a[d].replace(/ /g,"+"));b=a.c+"?family="+c.join("%7C");0<a.f.length&&(b+="&subset="+a.f.join(","));0<a.g.length&&(b+="&text="+encodeURIComponent(a.g));return b};function za(a){this.f=a;this.a=[];this.c={}}
var Aa={latin:"BESbswy","latin-ext":"\u00e7\u00f6\u00fc\u011f\u015f",cyrillic:"\u0439\u044f\u0416",greek:"\u03b1\u03b2\u03a3",khmer:"\u1780\u1781\u1782",Hanuman:"\u1780\u1781\u1782"},Ba={thin:"1",extralight:"2","extra-light":"2",ultralight:"2","ultra-light":"2",light:"3",regular:"4",book:"4",medium:"5","semi-bold":"6",semibold:"6","demi-bold":"6",demibold:"6",bold:"7","extra-bold":"8",extrabold:"8","ultra-bold":"8",ultrabold:"8",black:"9",heavy:"9",l:"3",r:"4",b:"7"},Ca={i:"i",italic:"i",n:"n",normal:"n"},
Da=/^(thin|(?:(?:extra|ultra)-?)?light|regular|book|medium|(?:(?:semi|demi|extra|ultra)-?)?bold|black|heavy|l|r|b|[1-9]00)?(n|i|normal|italic)?$/;
function Ea(a){for(var b=a.f.length,c=0;c<b;c++){var d=a.f[c].split(":"),e=d[0].replace(/\+/g," "),f=["n4"];if(2<=d.length){var g;var k=d[1];g=[];if(k)for(var k=k.split(","),h=k.length,m=0;m<h;m++){var l;l=k[m];if(l.match(/^[\w-]+$/)){var n=Da.exec(l.toLowerCase());if(null==n)l="";else{l=n[2];l=null==l||""==l?"n":Ca[l];n=n[1];if(null==n||""==n)n="4";else var r=Ba[n],n=r?r:isNaN(n)?"4":n.substr(0,1);l=[l,n].join("")}}else l="";l&&g.push(l)}0<g.length&&(f=g);3==d.length&&(d=d[2],g=[],d=d?d.split(","):
g,0<d.length&&(d=Aa[d[0]])&&(a.c[e]=d))}a.c[e]||(d=Aa[e])&&(a.c[e]=d);for(d=0;d<f.length;d+=1)a.a.push(new H(e,f[d]))}};function Fa(a,b){this.c=a;this.a=b}var Ga={Arimo:!0,Cousine:!0,Tinos:!0};Fa.prototype.load=function(a){var b=new C,c=this.c,d=new va(this.a.api,z(c),this.a.text),e=this.a.families;xa(d,e);var f=new za(e);Ea(f);A(c,ya(d),D(b));F(b,function(){a(f.a,f.c,Ga)})};function Ha(a,b){this.c=a;this.a=b}Ha.prototype.load=function(a){var b=this.a.id,c=this.c.m;b?B(this.c,(this.a.api||"https://use.typekit.net")+"/"+b+".js",function(b){if(b)a([]);else if(c.Typekit&&c.Typekit.config&&c.Typekit.config.fn){b=c.Typekit.config.fn;for(var e=[],f=0;f<b.length;f+=2)for(var g=b[f],k=b[f+1],h=0;h<k.length;h++)e.push(new H(g,k[h]));try{c.Typekit.load({events:!1,classes:!1,async:!0})}catch(m){}a(e)}},2E3):a([])};function Ia(a,b){this.c=a;this.f=b;this.a=[]}Ia.prototype.load=function(a){var b=this.f.id,c=this.c.m,d=this;b?(c.__webfontfontdeckmodule__||(c.__webfontfontdeckmodule__={}),c.__webfontfontdeckmodule__[b]=function(b,c){for(var g=0,k=c.fonts.length;g<k;++g){var h=c.fonts[g];d.a.push(new H(h.name,ga("font-weight:"+h.weight+";font-style:"+h.style)))}a(d.a)},B(this.c,z(this.c)+(this.f.api||"//f.fontdeck.com/s/css/js/")+ea(this.c)+"/"+b+".js",function(b){b&&a([])})):a([])};var Y=new pa(window);Y.a.c.custom=function(a,b){return new ua(b,a)};Y.a.c.fontdeck=function(a,b){return new Ia(b,a)};Y.a.c.monotype=function(a,b){return new sa(b,a)};Y.a.c.typekit=function(a,b){return new Ha(b,a)};Y.a.c.google=function(a,b){return new Fa(b,a)};var Z={load:p(Y.load,Y)};"function"===typeof define&&define.amd?define(function(){return Z}):"undefined"!==typeof module&&module.exports?module.exports=Z:(window.WebFont=Z,window.WebFontConfig&&Y.load(window.WebFontConfig));}());
