# Supplementary material
Source: ML conference proceedings conference paper supplement (https://proceedings.neurips.cc/paper_files/paper/2022/hash/1b3750390ca8b931fb9ca988647940cb-Abstract.html)
Supplement: Supplementary file 1 [file 1b3750390ca8b931fb9ca988647940cb-Supplemental-Conference.zip › supplemental/index.html]

NeMF


# NeMF: Neural Motion Fields for Kinematic Animation

Submission ID: 5631

- 1. Sanity Test
  - 1.1 Motion Reconstruction
  - 1.2 Temporal Sampling
- 2. Comparison
  - 2.1 Comparison with Different Architectures
  - 2.2 Comparison with other Methods
- 3. Play with the Latent Space
  - 3.1 Interpolation
  - 3.2 Composition
- 4. Applications
  - 4.1 Motion In-betweening
  - 4.2 Motion Re-navigating
- 5. Supplemental

### 1. Sanity Test

### 1.1 Motion Reconstruction

We first perform a sanity test to validate the reconstruction capability of our single-motion NeMF architecture. Here we present two examples of human motion and dog motion,
respectively. Note that the dog motion contains 4336 frames (73 seconds) in total and we just render the first 900
frames for visualization.

[](./files/video/amass_recon.mp4)

[](./files/video/dog.mp4)

### 1.2 Temporal Sampling

Unlike other motion models, NeMF is a continuous motion model that can synthesize motion at different frame rates in theory. However, in practice, the dimension of the Fourier
temporal features generated by positional encoding plays a critical role in
the smoothness of motion. Here we show three comparisons of different dimensions to verify that a proper dimension choice can produce smooth motion even sampled at 240 fps.

[](./files/video/30fps.mp4)

[](./files/video/60fps.mp4)

[](./files/video/240fps.mp4)

### 2. Comparison

### 2.1 Comparison with Different Architectures

In the seperate model, we let NeMF predicts the local motion and global orientation first and then predict the global translation, while alternatively, in the integrated model, the
whole motion is predicted all together. Here we show that the integrated model tends to have sliding artifacts when being used in motion inbetweening tasks.

[](./files/video/no_trans.mp4)

[](./files/video/with_trans.mp4)

### 2.2 Comparison with other Methods

Here we show the comparison of our method with HM-VAE and HuMoR for the motion reconstruction task. Note that HM-VAE fails to reconstruct a plausible result and HuMoR's result
will
gradually diverge. Our method achieves the best reconstruction result among these three methods.

[](./files/video/recon_comp_1.mp4)

### 3. Play with The Latent Space

### 3.1 Interpolation

In the video below, we linearly interpolate the latent codes from the two motions on the side and visualize three samples in the middle. These results suggest the smoothness of our
latent space which produces a smooth style changing while preserving the perceptual plausibility.

[](./files/video/lerp_color.mp4)

### 3.2 Composition

Since we disentangle the latent space for global root orientation and local motion, we can combine different global and local latent codes to create interesting new motions. In the
case below, we cancel the spinning motion of a pirouette jump by replacing the global latent code.

[](./files/video/reorient_spin.mp4)

In the case below, we introduce a natural turning to the global translation also by changing the global latent code.

[](./files/video/reorient_turn.mp4)

### 4. Applications

### 4.1 Motion In-betweening

**Motion Clips In-betweening** Here we show the example of generating 30-frame inbetweens for 2 clips. We compare our results with SLERP, Inertialization, Robust Motion In-betweening (RMI) and HM-VAE.

[](./files/video/clip_inbetween/slerp.mp4)

[](./files/video/clip_inbetween/inertia.mp4)

[](./files/video/clip_inbetween/rmi.mp4)

[](./files/video/clip_inbetween/hm_vae.mp4)

[](./files/video/clip_inbetween/nemf.mp4)

[](./files/video/clip_inbetween/gt.mp4)

**AIST++ Dance In-betweening** Here we show the example of generating transitions between two real dancing footages in AIST++.

[](./files/video/aist_1.mp4)

[](./files/video/aist_2.mp4)

**Sparse Keyframe In-betweening** Here we show the example of generating inbetweens for keyframes placed every 20 frames. We compare our results with SLERP and HM-VAE.

[](./files/video/keyframe_inbetween/slerp.mp4)

[](./files/video/keyframe_inbetween/hm_vae.mp4)

[](./files/video/keyframe_inbetween/nemf.mp4)

[](./files/video/keyframe_inbetween/gt.mp4)

### 4.2 Motion Re-Navigating

Here we show the example of redirecting the reference motion to different synthetic trajectories.

### Reference Motion

[](./files/video/renavi_gt_hi.mp4)

### Straight Line

[](./files/video/renavi_line_hi.mp4)

### Sinusoidal Curve

[](./files/video/renavi_sinusoidal_hi.mp4)
